# Supplementary material for: Development of a Resveratrol Nanosuspension Using the Antisolvent Precipitation Method without Solvent Removal, Based on a Quality by Design (QbD) Approach
Source: MDPI journal article supplement (doi:10.3390/pharmaceutics11120688), 2019-12-17
Supplement: s1 [file s1]

# Supplementary Materials: Development of a Resveratrol Nanosuspension Using the Antisolvent Precipitation Method, Based on a Quality by Design (QbD) Approach

Do-Hoon Kuk, Eun-Sol Ha, Dong-Hyun Ha, Woo-Yong Sim, Seon-Kwang Lee, Ji-Su Jeong, Jeong-Soo Kim, In-hwan Baek, Heejun Park, Du Hyung Choi, Jin-Wook Yoo, Sung-Joo Hwang, and Min-Soo Kim

**Table S1.** Initial risk assessment of the resveratrol nanosuspension.

| CQAs                              | Parameters                    | Risk Level | Justification                                                                                                                                                                        |
|-----------------------------------|-------------------------------|------------|--------------------------------------------------------------------------------------------------------------------------------------------------------------------------------------|
| Particle size<br>(z-average, d90) | Resveratrol concentration     | High       | If the concentration of resveratrol is excessively high, particles grow very quickly during the manufacturing process. Therefore, the risk level was high.                           |
|                                   | Stabilizer type               | High       | The ability to inhibit particle growth depends on the type of stabilizer. Therefore, the risk level was high.                                                                        |
|                                   | Stabilizer concentration      | High       | An appropriate concentration of stabilizer has an effective ability to inhibit particle growth. Therefore, the risk level was high.                                                  |
|                                   | Solvent type                  | High       | The solvent and anti-solvent should be sufficiently miscible, and the solvent should have a solubilization effect. Therefore, the risk level was high.                               |
|                                   | Ratio of solvent/anti-solvent | High       | The solubility of resveratrol for the mixture solvents depends on the ratio of the solvent/anti-solvent. The solubility affects particle growth. Therefore, the risk level was high. |
|                                   | Mixing speed                  | High       | Depending on the mixing speed, the mixing speed of the anti-solvent and solvent vary, and can affect particle growth rate. Therefore, the risk level was high.                       |
|                                   | Mixing time                   | High       | Mixing time can affect particle growth. Therefore, the risk level was high.                                                                                                          |
|                                   | Injection rate (solvent)      | High       | Depending on the rate of injection of solvent, the mixing speed of the anti-solvent and solvent vary, which can affect the particle growth rate. Therefore, the risk level was high. |
|                                   | Temperature                   | High       | The solubility of resveratrol changes when the temperature of the solvent changes, which can affect particle growth. Therefore, the risk level was high.                             |
| Zeta Potential                    | Resveratrol concentration     | Low        | The effect of changes in resveratrol concentration on the zeta potential is insignificant. Therefore, the risk level was low.                                                        |
|                                   | Stabilizer type               | High       | Depending on the type of stabilizer, the surface charge of the particles differs. Therefore, the risk level was high.                                                                |
|                                   | Stabilizer concentration      | High       | Depending on the concentration of stabilizer, the surface charge of the particles differs. Therefore, the risk level was high.                                                       |

|              |                               |        |                                                                                                                                                                                                                                                  |
|--------------|-------------------------------|--------|--------------------------------------------------------------------------------------------------------------------------------------------------------------------------------------------------------------------------------------------------|
|              | Solvent type                  | Low    | The influence of the type of solvent on the surface charge of the particles was insignificant. Therefore, the risk level was low.                                                                                                                |
|              | Ratio of solvent/anti-solvent | Medium | Depending on the solvent/anti-solvent ratio, the concentration of the stabilizer in the mixture solvent varies, which affects the surface charge of the particles. Therefore, the risk level was medium.                                         |
|              | Mixing speed                  | Low    | The effect of mixing speed on the zeta potential is insignificant. Therefore, the risk level was low.                                                                                                                                            |
|              | Mixing time                   | Low    | The effect of mixing time on the zeta potential is insignificant. Therefore, the risk level was low.                                                                                                                                             |
|              | Injection rate (solvent)      | Low    | The effect of injection rate on the zeta potential is insignificant. Therefore, the risk level was low.                                                                                                                                          |
|              | Temperature                   | Low    | The effect of temperature on the zeta potential is insignificant. Therefore, the risk level was low.                                                                                                                                             |
|              | Resveratrol concentration     | Low    | Resveratrol is chemically stable when light is blocked. Nanosuspensions were prepared in a space where light was blocked, and the possibility of drug loss during the manufacturing process is insignificant. Therefore, the risk level was low. |
|              | Stabilizer type               | Low    |                                                                                                                                                                                                                                                  |
|              | Stabilizer concentration      | Low    |                                                                                                                                                                                                                                                  |
|              | Solvent type                  | Low    |                                                                                                                                                                                                                                                  |
|              | Ratio of solvent/anti-solvent | Low    |                                                                                                                                                                                                                                                  |
|              | Mixing speed                  | Low    |                                                                                                                                                                                                                                                  |
|              | Mixing time                   | Low    |                                                                                                                                                                                                                                                  |
| Drug content | Injection rate (solvent)      | Low    |                                                                                                                                                                                                                                                  |
|              | Temperature                   | Low    |                                                                                                                                                                                                                                                  |

**Table S2.** Particle size of resveratrol nanosuspensions prepared using a polymer.

| <b>Polymer</b> | <b>Concentration<br/>(%, w/v)</b> | <b>Particle size<br/>(z-average, nm)</b> | <b>Particle size<br/>(d50, nm)</b> | <b>Particle size<br/>(d90, nm)</b> |
|----------------|-----------------------------------|------------------------------------------|------------------------------------|------------------------------------|
| PVP K12        | 2.0                               | N.D <sup>a</sup>                         | N.D                                | N.D                                |
|                | 1.0                               | N.D                                      | N.D                                | N.D                                |
|                | 0.5                               | N.D                                      | N.D                                | N.D                                |
|                | 0.1                               | N.D                                      | N.D                                | N.D                                |
| PVP K17        | 2.0                               | N.D                                      | N.D                                | N.D                                |
|                | 1.0                               | N.D                                      | N.D                                | N.D                                |
|                | 0.5                               | N.D                                      | N.D                                | N.D                                |
|                | 0.1                               | N.D                                      | N.D                                | N.D                                |
| PVP K25        | 2.0                               | N.D                                      | N.D                                | N.D                                |
|                | 1.0                               | N.D                                      | N.D                                | N.D                                |
|                | 0.5                               | N.D                                      | N.D                                | N.D                                |
|                | 0.1                               | N.D                                      | N.D                                | N.D                                |
| PVP K30        | 2.0                               | N.D                                      | N.D                                | N.D                                |
|                | 1.0                               | N.D                                      | N.D                                | N.D                                |
|                | 0.5                               | N.D                                      | N.D                                | N.D                                |
|                | 0.1                               | N.D                                      | N.D                                | N.D                                |
| PVP K90        | 2.0                               | N.D                                      | N.D                                | N.D                                |
|                | 1.0                               | N.D                                      | N.D                                | N.D                                |
|                | 0.5                               | N.D                                      | N.D                                | N.D                                |
|                | 0.1                               | N.D                                      | N.D                                | N.D                                |
| PVP VA64       | 2.0                               | N.D                                      | N.D                                | N.D                                |
|                | 1.0                               | N.D                                      | N.D                                | N.D                                |
|                | 0.5                               | N.D                                      | N.D                                | N.D                                |
|                | 0.1                               | N.D                                      | N.D                                | N.D                                |

|           |     |                   |      |      |
|-----------|-----|-------------------|------|------|
| HPMC 3cp  | 2.0 | 515 <sup>b</sup>  | 520  | 6402 |
|           | 1.0 | 867 <sup>b</sup>  | 1004 | 2034 |
|           | 0.5 | 1357 <sup>b</sup> | 1760 | 3198 |
|           | 0.1 | N.D               | N.D  | N.D  |
| HPMC 6cp  | 2.0 | 331 <sup>b</sup>  | 357  | 1290 |
|           | 1.0 | 618 <sup>b</sup>  | 573  | 7441 |
|           | 0.5 | 978 <sup>b</sup>  | 1008 | 1646 |
|           | 0.1 | N.D               | N.D  | N.D  |
| HPMC 15cp | 2.0 | N.D               | N.D  | N.D  |
|           | 1.0 | 663 <sup>b</sup>  | 820  | 1756 |
|           | 0.5 | 1122 <sup>*</sup> | 1337 | 2318 |
|           | 0.1 | N.D               | N.D  | N.D  |

<sup>a</sup>N.D indicates that data cannot be measured and there is no data. <sup>b</sup>Precipitation occurs due to particle agglomeration.

**Table S3.** Particle size of resveratrol nanosuspensions prepared using a polymer/polymer combination.

| Polymer / Polymer  | Concentration (% w/v) | Particle size<br>(z-average, nm) | Particle size<br>(d50, nm) | Particle size<br>(d90, nm) |
|--------------------|-----------------------|----------------------------------|----------------------------|----------------------------|
| PVP VA64 / PVP K12 | 2.0 / 1.0             | N.D <sup>a</sup>                 | N.D                        | N.D                        |
|                    | 2.0 / 0.5             | N.D                              | N.D                        | N.D                        |
|                    | 1.0 / 1.0             | 1151 <sup>b</sup>                | 1058                       | 6760                       |
|                    | 0.5                   | N.D                              | N.D                        | N.D                        |
| PVP VA64 / PVP K17 | 2.0 / 1.0             | N.D                              | N.D                        | N.D                        |
|                    | 2.0 / 0.5             | N.D                              | N.D                        | N.D                        |
|                    | 1.0 / 1.0             | N.D                              | N.D                        | N.D                        |
|                    | 1.0 / 0.5             | 940 <sup>b</sup>                 | 877                        | 7053                       |
| PVP VA64 / PVP K25 | 2.0 / 1.0             | N.D                              | N.D                        | N.D                        |
|                    | 2.0 / 0.5             | N.D                              | N.D                        | N.D                        |
|                    | 1.0 / 1.0             | 1516 <sup>b</sup>                | 1326                       | 2245                       |
|                    | 1.0 / 0.5             | 500 <sup>*</sup>                 | 572                        | 5782                       |
| PVP VA64 / PVP K30 | 2.0 / 1.0             | 18 <sup>b</sup>                  | 15                         | 239                        |
|                    | 2.0 / 0.5             | 436 <sup>b</sup>                 | 196                        | 7521                       |
|                    | 1.0 / 1.0             | N.D                              | N.D                        | N.D                        |
|                    | 1.0 / 0.5             | N.D                              | N.D                        | N.D                        |
| PVP VA64 / PVP K90 | 2.0 / 1.0             | 258 <sup>b</sup>                 | 50                         | 3681                       |
|                    | 2.0 / 0.5             | N.D                              | N.D                        | N.D                        |
|                    | 1.0 / 1.0             | 948 <sup>b</sup>                 | 1173                       | 2339                       |
|                    | 1.0 / 0.5             | 1014 <sup>*</sup>                | 1500                       | 8217                       |
| HPMC 6cp / PVP K12 | 2.0 / 1.0             | N.D                              | N.D                        | N.D                        |
|                    | 2.0 / 0.5             | N.D                              | N.D                        | N.D                        |
|                    | 1.0 / 1.0             | N.D                              | N.D                        | N.D                        |
|                    | 1.0 / 0.5             | 380 <sup>b</sup>                 | 351                        | 2301                       |
| HPMC 6cp / PVP K17 | 2.0 / 1.0             | N.D                              | N.D                        | N.D                        |
|                    | 2.0 / 0.5             | N.D                              | N.D                        | N.D                        |
|                    | 1.0 / 1.0             | N.D                              | N.D                        | N.D                        |
|                    | 1.0 / 0.5             | 507 <sup>b</sup>                 | 451                        | 7239                       |

|                    |           |     |     |     |
|--------------------|-----------|-----|-----|-----|
| HPMC 6cp / PVP K25 | 2.0 / 1.0 | N.D | N.D | N.D |
|                    | 2.0 / 0.5 | N.D | N.D | N.D |
|                    | 1.0 / 1.0 | N.D | N.D | N.D |
|                    | 1.0 / 0.5 | N.D | N.D | N.D |
| HPMC 6cp / PVP K30 | 2.0 / 1.0 | N.D | N.D | N.D |
|                    | 2.0 / 0.5 | N.D | N.D | N.D |
|                    | 1.0 / 1.0 | N.D | N.D | N.D |
|                    | 1.0 / 0.5 | N.D | N.D | N.D |
| HPMC 6cp / PVP K90 | 2.0 / 1.0 | N.D | N.D | N.D |
|                    | 2.0 / 0.5 | N.D | N.D | N.D |
|                    | 1.0 / 1.0 | N.D | N.D | N.D |
|                    | 1.0 / 0.5 | N.D | N.D | N.D |

<sup>a</sup>N.D indicates that data cannot be measured and there is no data. <sup>b</sup>Precipitation occurs due to particle agglomeration.

**Table S4.** Particle size of resveratrol nanosuspensions prepared using various polymer/polymer/surfactant combinations.

| Polymer / Polymer / Surfactant |               | Concentration (% <sub>w/v</sub> ) | Particle size<br>(z-average, nm) | Particle size<br>(d50, nm) | Particle size<br>(d90, nm) |
|--------------------------------|---------------|-----------------------------------|----------------------------------|----------------------------|----------------------------|
| PVP VA64 /                     | PVP K12 / SLS | 1.0 / 0.5 / 0.1                   | 46.5                             | 66.8                       | 179.2                      |
| PVP VA64 /                     | PVP K17 / SLS | 1.0 / 0.5 / 0.1                   | 59.2                             | 80.5                       | 178.6                      |
| PVP VA64 /                     | PVP K25 / SLS | 1.0 / 0.5 / 0.1                   | 66.2                             | 61.3                       | 552.9                      |
| PVP VA64 /                     | PVP K30 / SLS | 1.0 / 0.5 / 0.1                   | 57.5                             | 88.0                       | 212.6                      |
| PVP VA64 /                     | PVP K90 / SLS | 1.0 / 0.5 / 0.1                   | 72.6                             | 108.3                      | 255.3                      |
| HPMC 6cp /                     | PVP K12 / SLS | 1.0 / 0.5 / 0.1                   | 210.4                            | 217.1                      | 516.2                      |
| HPMC 6cp /                     | PVP K17 / SLS | 1.0 / 0.5 / 0.1                   | 203.4                            | 205.3                      | 362.6                      |
| HPMC 6cp /                     | PVP K25 / SLS | 1.0 / 0.5 / 0.1                   | 236.2                            | 230.5                      | 525.7                      |
| HPMC 6cp /                     | PVP K30 / SLS | 1.0 / 0.5 / 0.1                   | 236.8                            | 232.0                      | 548.1                      |
| HPMC 6cp /                     | PVP K90 / SLS | 1.0 / 0.5 / 0.1                   | 208.2                            | 209.7                      | 406.6                      |

**Table S5.** Particle size of resveratrol nanosuspensions prepared using various resveratrol concentrations in Transcutol HP and various ratios of solvent/antisolvent using PVP VA64/PVP K12/SLS (1.0%/0.5%/0.1%, *w/v*).

| Resveratrol concentration in Transcutol HP | Ratio of solvent/anti-solvent | Resveratrol in nanosuspension | Particle size (z-average, nm) | Particle size (d50, nm) | Particle size (d90, nm) |
|--------------------------------------------|-------------------------------|-------------------------------|-------------------------------|-------------------------|-------------------------|
| 100 mg/mL                                  | 1/9                           | 10 mg/mL                      | 140.3                         | 101.4                   | 1180.9                  |
| 100 mg/mL                                  | 1/19                          | 5 mg/mL                       | 44.7                          | 60.0                    | 165.6                   |
| 200 mg/mL                                  | 1/19                          | 10 mg/mL                      | 1293.5                        | 1792.1                  | 34516.2                 |
| 200 mg/mL                                  | 1/39                          | 5 mg/mL                       | 225.7                         | 117.2                   | 2780.4                  |

**Table S6.** Updated risk assessment of resveratrol nanosuspension after preformulation and screening study.

| CQAs                           | Parameters                    | Risk level | Justification                                                                                                                                                                                                                                    |
|--------------------------------|-------------------------------|------------|--------------------------------------------------------------------------------------------------------------------------------------------------------------------------------------------------------------------------------------------------|
| Particle size (z-average, d90) | Resveratrol concentration     | Low        | In a preliminary experiment, the resveratrol concentration was fixed at 100 mg/mL to satisfy the define QTPP. Therefore, the risk level was reduced to low.                                                                                      |
|                                | Stabilizer type               | Low        | Based on preliminary experiments, PVP VA64, PVP K12, and SLS were selected as stabilizers. Therefore, the risk level was reduced to low.                                                                                                         |
|                                | Solvent type                  | Low        | Based on preliminary experiments, Transcutol® HP was selected as a solvent. Therefore, the risk level was reduced to low.                                                                                                                        |
|                                | Ratio of solvent/anti-solvent | Low        | Based on preliminary experiments, the solvent/anti-solvent ratio was fixed at 1/19 to satisfy the define QTPP. Therefore, the risk level was reduced to low.                                                                                     |
|                                | Mixing speed                  | Medium     | In a preliminary experiment, a nanosuspension that satisfied the target values was prepared at a mixing speed of 750 rpm. However, the mixing speed can still affect particle size. Therefore, the risk level was reduced to medium.             |
|                                | Mixing time                   | Low        | In preliminary experiments, the effect of mixing time on the particle size distribution was insignificant. Therefore, the risk level was reduced to low.                                                                                         |
|                                | Injection rate (solvent)      | Medium     | In a preliminary experiment, a nanosuspension that satisfied the target values was prepared at an injection rate of 1.0 mL/min. However, the injection rate can still affect the particle size. Therefore, the risk level was reduced to medium. |
|                                | Temperature                   | Medium     | In a preliminary experiment, a nanosuspension that satisfied the target values was prepared at 25°C. However, the temperature can still affect the particle size. Therefore, the risk level was reduced to medium.                               |

|                |                               |      |                                                                                                                                                        |
|----------------|-------------------------------|------|--------------------------------------------------------------------------------------------------------------------------------------------------------|
| Zeta Potential | Stabilizer type               | Low  | In preliminary experiments, PVP VA64, PVP K12, and SLS were selected as stabilizers. Therefore, the risk level was reduced to low.                     |
|                | Stabilizer concentration      | High | Depending on the concentration of stabilizer, the surface charge of the particles is different. Therefore, the risk level was high.                    |
|                | Ratio of solvent/anti-solvent | Low  | In preliminary experiments, the solvent/anti-solvent ratio was fixed at 1/19 to satisfy the define QTPP. Therefore, the risk level was reduced to low. |

**Table S7.** Summary of results of regression analysis for the fitted model of the full factorial design.

| Response       | $R^2$  | Pred. $R^2$ | PRESS   | %CV  | p-value | Remark          |
|----------------|--------|-------------|---------|------|---------|-----------------|
| Y <sub>1</sub> | 0.9901 | 0.4876      | 58.36   | 1.50 | 0.0295  | Significant     |
| Y <sub>2</sub> | 0.9912 | 0.9271      | 7.70    | 0.41 | 0.0028  | Significant     |
| Y <sub>3</sub> | 0.7011 | 0.1557      | 47.78   | 1.18 | 0.0882  | Not significant |
| Y <sub>4</sub> | 0.4176 | -0.5642     | 73.12   | 1.44 | 0.4009  | Not significant |
| Y <sub>5</sub> | 0.3285 | -0.0400     | 1166.64 | 5.90 | 0.1067  | Not significant |
| Y <sub>6</sub> | 0.9959 | 0.9602      | 7.60    | 0.26 | 0.0122  | Significant     |
| Y <sub>7</sub> | 0.3503 | -0.1103     | 517.28  | 2.55 | 0.0932  | Not significant |
| Y <sub>8</sub> | 0.7269 | 0.4196      | 168.17  | 1.36 | 0.0204  | Significant     |
| Y <sub>9</sub> | 0.9496 | 0.7110      | 10.73   | 1.86 | 0.0074  | Significant     |

Regression equation of the fitted model

$$Y_1 = 49.97 + 0.97X_1 - 2.12X_2 - 0.93X_3 - 0.92X_1X_2 - 1.12X_1X_3 - 2.39X_2X_3$$

$$Y_2 = 134.54 - 0.10X_1 - 2.28X_2 - 0.16X_3 - 1.85X_1X_2 - 2.10X_2X_3$$

$$Y_3 = 155.63 - 0.03X_1 - 0.72X_2 - 2.11X_1X_2$$

$$Y_4 = 162.25 + 0.17X_1 - 0.15X_2 - 1.55X_1X_2$$

$$Y_5 = 175.88 + 6.79X_1$$

$$Y_6 = 241.87 + 1.50X_1 + 0.71X_2 - 1.96X_3 - 0.85X_1X_2 + 4.05X_1X_3 + 0.30X_2X_3$$

$$Y_7 = 258.09 - 4.52X_3$$

$$Y_8 = 266.96 + 4.74X_2 + 1.97X_3$$

$$Y_9 = -36.74 - 0.90X_1 - 0.10X_2 - 0.22X_3 + 1.88X_2X_3$$

$R^2$ , coefficient of determination; PRESS, predicted residual error sum of squares; CV, coefficient of variation.



**Table S8.** Predicted values (95% prediction interval) for responses (Y<sub>1</sub>–Y<sub>9</sub>).

| Response       | 95% PI (low) | 95% PI (high) | Predicted mean | Actual mean |
|----------------|--------------|---------------|----------------|-------------|
| Y <sub>1</sub> | 35.4         | 58.1          | 46.7           | 46.3        |
| Y <sub>2</sub> | 134.3        | 149.3         | 141.8          | 139.2       |
| Y <sub>3</sub> | 149.0        | 169.6         | 159.3          | 154.6       |
| Y <sub>4</sub> | 167.5        | 183.7         | 175.6          | 169.7       |
| Y <sub>5</sub> | 147.6        | 169.4         | 158.5          | 157.7       |
| Y <sub>6</sub> | 241.1        | 260.0         | 250.5          | 255.0       |
| Y <sub>7</sub> | 234.2        | 281.6         | 257.9          | 252.9       |
| Y <sub>8</sub> | 240.3        | 286.8         | 263.5          | 250.9       |
| Y <sub>9</sub> | –43.37       | –35.45        | –39.41         | –38.02      |

PI, prediction interval.

**Table S9.** Updated risk assessment of resveratrol nanosuspension after optimization study.

| CQAs                                           | Parameters                    | Risk level | Justification                                                                                                                                                                   |
|------------------------------------------------|-------------------------------|------------|---------------------------------------------------------------------------------------------------------------------------------------------------------------------------------|
| Particle size<br>(z-average, d <sub>90</sub> ) | Resveratrol concentration     | Low        | Based on a preliminary experiment, the resveratrol concentration was fixed at 100 mg/mL. Therefore, the risk level was reduced to low.                                          |
|                                                | Stabilizer type               | Low        | In preliminary experiments, PVP VA64, PVP K12, and SLS were selected as stabilizers. Therefore, the risk level was reduced to low.                                              |
|                                                | Stabilizer concentration      | Low        | The particle size distribution in the optimized nanosuspension satisfies the set target range. Therefore, the risk level was reduced to low.                                    |
|                                                | Solvent type                  | Low        | Based on preliminary experiments, Transcutol® HP was selected as a solvent. Therefore, the risk level was reduced to low.                                                       |
|                                                | Ratio of solvent/anti-solvent | Low        | Based on preliminary experiments, the ratio of solvent/anti-solvent was fixed at 1/19. Therefore, the risk level was reduced to low.                                            |
|                                                | Mixing speed                  | Low        | The particle size distribution of the nanosuspension prepared at 500 rpm–1000 rpm was within the set target range. Therefore, the risk level was reduced to low.                |
|                                                | Mixing time                   | Low        | Based on preliminary experiments, the effect of mixing time on the particle size distribution was insignificant. Therefore, the risk level was reduced to low.                  |
|                                                | Injection rate (solvent)      | Low        | The particle size distribution of the nanosuspension prepared at an injection rate of 1.0 mL/min was within the set target range. Therefore, the risk level was reduced to low. |

|                |                               |     |                                                                                                                                                                                                                                                            |
|----------------|-------------------------------|-----|------------------------------------------------------------------------------------------------------------------------------------------------------------------------------------------------------------------------------------------------------------|
|                | Temperature                   | Low | The particle size distribution of the nanosuspension prepared at 20°C ~ 30°C was within the set target range. Therefore, the risk level was reduced to low.                                                                                                |
| Zeta Potential | Resveratrol concentration     | Low | The effect of changes in the resveratrol concentration on the zeta potential is insignificant. Therefore, the risk level was low.                                                                                                                          |
|                | Stabilizer type               | Low | Based on preliminary experiments, PVP VA64, PVP K12, and SLS were selected as stabilizers. Therefore, the risk level was reduced to low.                                                                                                                   |
|                | Stabilizer concentration      | Low | In the optimized nanosuspension, the zeta potential value was -32.9 mV to -39.6 mV and satisfied the target range. Therefore, the risk level was reduced to low.                                                                                           |
|                | Solvent type                  | Low | The influence of the type of solvent on the surface charge of the particles was insignificant. Therefore, the risk was low.                                                                                                                                |
|                | Ratio of solvent/anti-solvent | Low | Based on preliminary experiments, the solvent/anti-solvent ratio was fixed at 1/19. Therefore, the risk was reduced to low.                                                                                                                                |
|                | Mixing speed                  | Low | The effect of mixing speed on the zeta potential was insignificant. Therefore, the risk was low.                                                                                                                                                           |
|                | Mixing time                   | Low | The effect of mixing time on the zeta potential was insignificant. Therefore, the risk was low.                                                                                                                                                            |
|                | Injection rate (solvent)      | Low | The effect of injection rate on the zeta potential was insignificant. Therefore, the risk was low.                                                                                                                                                         |
|                | Temperature                   | Low | The effect of temperature on the zeta potential was insignificant. Therefore, the risk was low.                                                                                                                                                            |
| Drug content   | Resveratrol concentration     | Low | Resveratrol is chemically stable when light is blocked. Nanosuspensions were prepared in a space where light is blocked, and the possibility of drug loss during the manufacturing process is insignificant. Therefore, the risk level was reduced to low. |
|                | Stabilizer type               | Low |                                                                                                                                                                                                                                                            |
|                | Stabilizer concentration      | Low |                                                                                                                                                                                                                                                            |
|                | Solvent type                  | Low |                                                                                                                                                                                                                                                            |
|                | Ratio of solvent/anti-solvent | Low |                                                                                                                                                                                                                                                            |
|                | Mixing speed                  | Low |                                                                                                                                                                                                                                                            |
|                | Mixing time                   | Low |                                                                                                                                                                                                                                                            |
|                | Injection rate (solvent)      | Low |                                                                                                                                                                                                                                                            |
|                | Temperature                   | Low |                                                                                                                                                                                                                                                            |

**Table S10.** Summary of long-term stability test results for the optimized resveratrol nanosuspension.

| Days | Response                         |                            |                        |                     |
|------|----------------------------------|----------------------------|------------------------|---------------------|
|      | Particle size<br>(z-average, nm) | Particle size<br>(d90, nm) | Zeta potential<br>(mV) | Drug content<br>(%) |
| 0    | 46.3                             | 157.7                      | -38.02                 | 100.02              |
| 1    | 139.2                            | 255.0                      | N.D <sup>a</sup>       | N.D <sup>a</sup>    |
| 3    | 154.6                            | 252.9                      | N.D <sup>a</sup>       | N.D                 |
| 7    | 169.7                            | 250.9                      | N.D <sup>a</sup>       | N.D                 |
| 30   | 178.7                            | 302.9                      | -37.61                 | 99.62               |
| 60   | 189.8                            | 311.3                      | N.D <sup>a</sup>       | 99.21               |
| 90   | 197.9                            | 312.1                      | N.D <sup>a</sup>       | 98.87               |
| 120  | 204.4                            | 311.1                      | N.D <sup>a</sup>       | 98.55               |
| 150  | 209.4                            | 320.7                      | N.D <sup>a</sup>       | 98.14               |
| 180  | 212.6                            | 321.0                      | -37.29                 | 97.81               |

<sup>a</sup>N.D indicates that data cannot be measured and there is no data.
